# Supplementary material for: Metformin inhibits melanoma cell metastasis by suppressing the miR-5100/SPINK5/STAT3 axis
Source: PubMed Central journal article supplement (PMC9199130; doi:10.1186/s11658-022-00353-5), 2022-06-15
Supplement: 11658_2022_353_MOESM2_ESM.pdf [file 11658_2022_353_MOESM2_ESM.pdf]

## Supplementary data 2

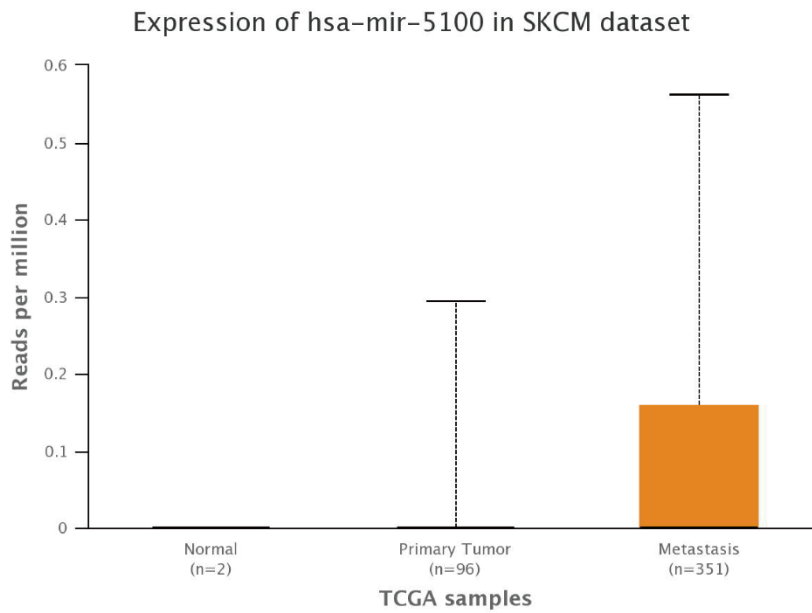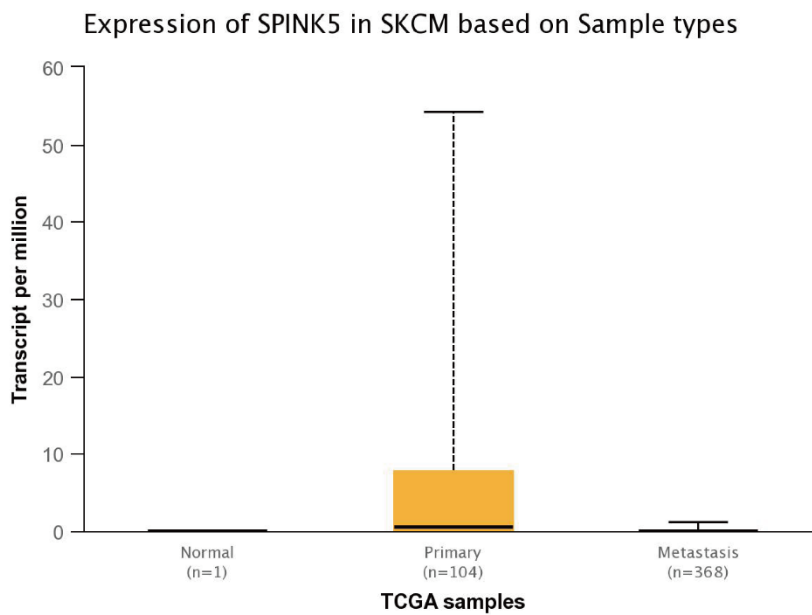

TCGA data showed the expression patterns of miR-5100 and SPINK5 in normal tissue, primary melanoma and metastatic melanoma.
